# Supplementary material for: Risk Factors Associated with Cognitive Decline after Cardiac Surgery: A Systematic Review
Source: PubMed Central journal article supplement (PMC4605208; doi:10.1155/2015/370612), 2015-09-30
Supplement: 370612.f1.pdf [file 370612.f1.pdf]

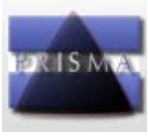

## Supplementary Material

### PRISMA 2009 Flow Diagram

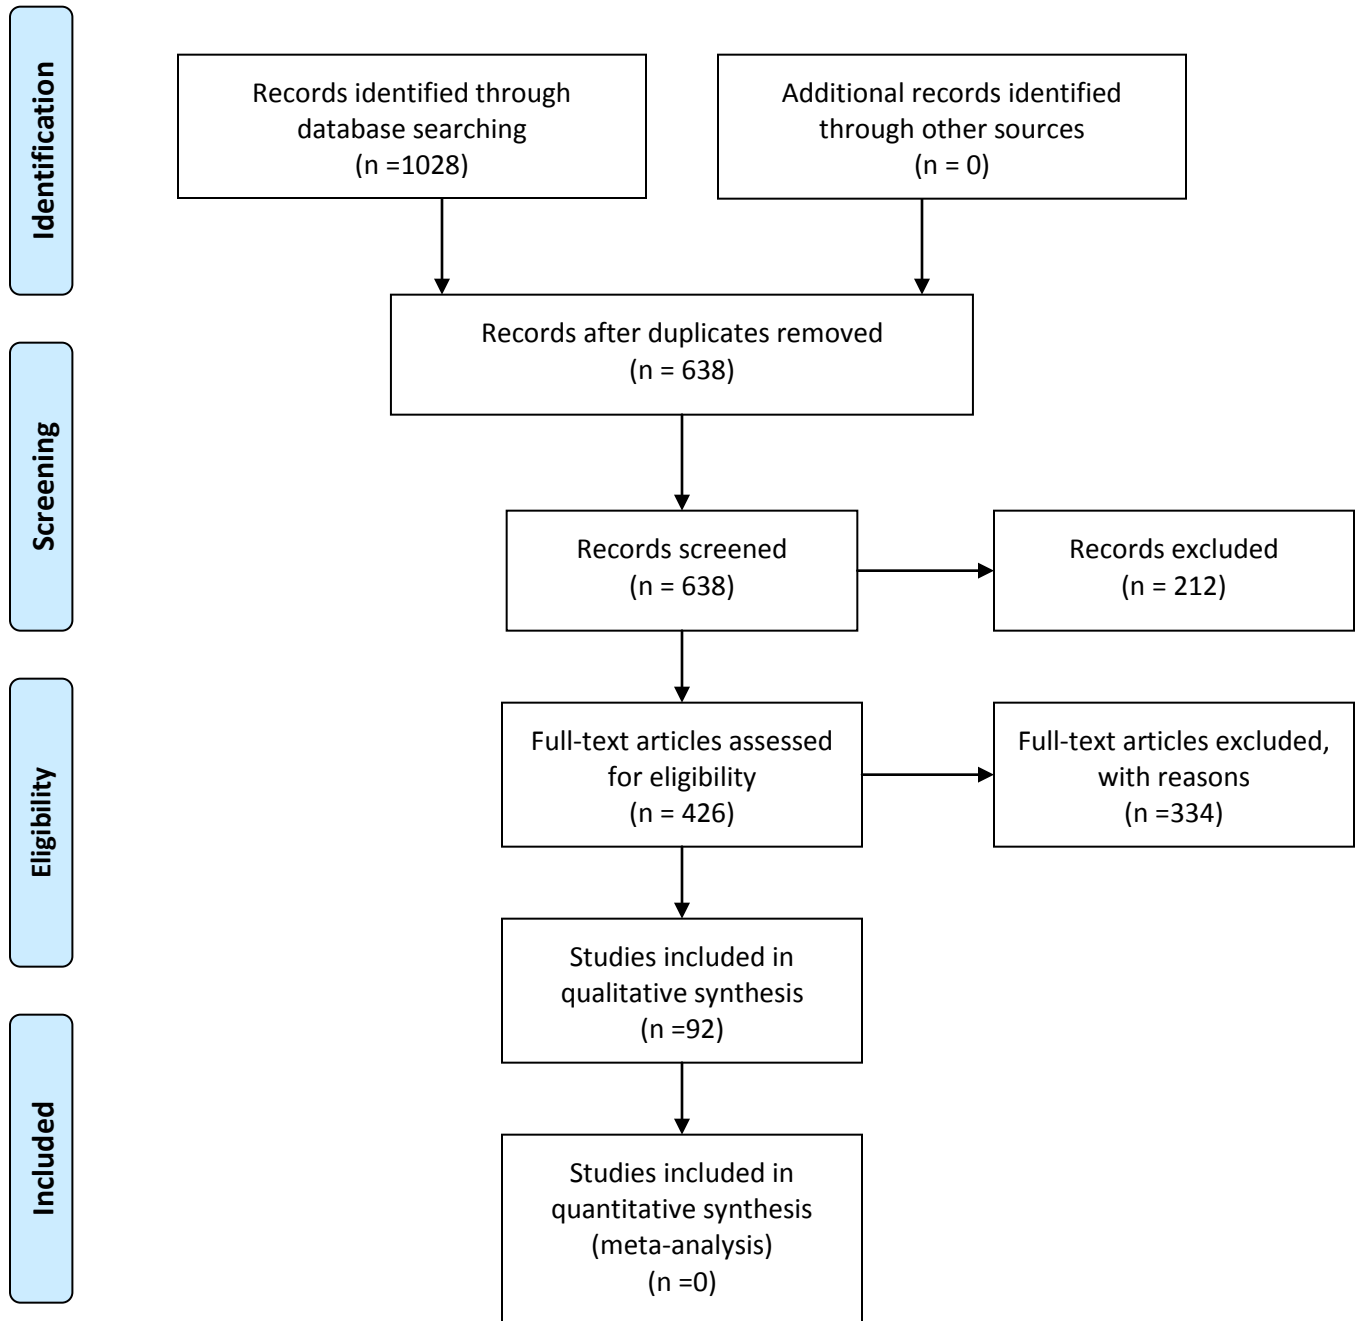

From: Moher D, Liberati A, Tetzlaff J, Altman DG, The PRISMA Group (2009). Preferred Reporting Items for Systematic Reviews and Meta-Analyses: The PRISMA Statement. PLoS Med 6(6): e1000097. doi:10.1371/journal.pmed1000097

For more information, visit [www.prisma-statement.org](http://www.prisma-statement.org).
